# Supplementary material
Source: Springer Nature journal article supplement (https://www.springermedizin.de/resource/supplementary/12943_2013_1168_MOESM4_ESM.pdf/9552586)
Supplement: MOESM4 [file 9552586]

Additional file 4. Correlations of *ERBB3* to the 6-GeneSig and other *ERBB* family members

|               |      | <i>ERBB3</i> |        |        |        |        |
|---------------|------|--------------|--------|--------|--------|--------|
|               |      | Data set     | 1      | 2      | 3      | 4      |
| <i>ALK</i>    | PC   |              | -0.201 | -0.343 | -0.279 | -0.377 |
|               | Sign |              |        |        | **     | ***    |
|               | N    |              | 17     | 30     | 102    | 110    |
| <i>BIRC5</i>  | PC   |              | -0.451 | -0.486 | -0.452 | -0.626 |
|               | Sign |              |        | **     | **     | ***    |
|               | N    |              | 17     | 30     | 102    | 110    |
| <i>CCND1</i>  | PC   |              | -0.305 | -0.599 | -0.253 | -0.455 |
|               | Sign |              |        | ***    | *      | **     |
|               | N    |              | 17     | 30     | 102    | 110    |
| <i>MYCN</i>   | PC   |              | -0.421 | -0.454 | -0.290 | -0.551 |
|               | Sign |              |        | *      | **     | ***    |
|               | N    |              | 17     | 30     | 102    | 110    |
| <i>NTRK1</i>  | PC   |              | -0.063 | -0.223 | 0.266  | -0.135 |
|               | Sign |              |        |        | **     |        |
|               | N    |              | 17     | 30     | 102    | 110    |
| <i>PHOX2B</i> | PC   |              | -0.803 | -0.782 | -0.216 | -0.739 |
|               | Sign |              | ***    | ***    | *      | ***    |
|               | N    |              | 17     | 30     | 102    | 110    |

|              |      | <i>EGFR</i> |       |       |       | <i>ERBB2</i> |        |        |        | <i>ERBB3</i> |        |        |       |        |
|--------------|------|-------------|-------|-------|-------|--------------|--------|--------|--------|--------------|--------|--------|-------|--------|
|              |      | Data set    | 1     | 2     | 3     | 4            | 1      | 2      | 3      | 4            | 1      | 2      | 3     | 4      |
| <i>ERBB4</i> | PC   |             | 0.236 | -0.14 | 0.124 | -0.056       | -0.114 | -0.154 | -0.107 | -0.17        | -0.058 | -0.206 | 0.059 | -0.219 |
|              | Sign |             |       |       |       |              |        |        |        |              |        |        | *     |        |
|              | N    |             | 17    | 30    | 102   | 110          | 17     | 30     | 102    | 110          | 17     | 30     | 102   | 110    |
| <i>EGFR</i>  | PC   |             |       |       |       |              | 0.411  | 0.705  | 0.250  | 0.822        | 0.4    | 0.819  | 0.359 | 0.769  |
|              | Sign |             |       |       |       |              |        | ***    | *      | ***          |        | ***    | ***   | ***    |
|              | N    |             |       |       |       |              | 17     | 30     | 102    | 110          | 17     | 30     | 102   | 110    |
| <i>ERBB2</i> | PC   |             |       |       |       |              |        |        |        |              | 0.623  | 0.881  | 0.414 | 0.800  |
|              | Sign |             |       |       |       |              |        |        |        |              | ***    | ***    | ***   | ***    |
|              | N    |             |       |       |       |              |        |        |        |              | 17     | 30     | 102   | 110    |

Left panel: Pearson Correlations (PC) of *ERBB3* to the 6-gene signature (6-GeneSig) in four data sets separately (1= De Preter, 2= McArdle/Wilzén, 3= Wang, 4=Versteeg). Right panel: Pearson Correlations between the four *ERBB*-genes in four data sets separately. Positive correlations are marked in grey, and negative correlations are marked in white. Significance (Sign; 2-tailed) is marked as follows: \*Significant at the 0.05 level; \*\*Significant at the 0.01 level; \*\*\*Significant at the 0.001 level. N=number of cases.
